# Supplementary material for: Combination of tumor necrosis factor‐α and epidermal growth factor induces the adrenergic‐to‐mesenchymal transdifferentiation in SH‐SY5Y neuroblastoma cells
Source: PubMed Central journal article supplement — Cancer Sci. 2020 Dec 21;112(2):715–24. doi: 10.1111/cas.14760 (PMC7893981; doi:10.1111/cas.14760), 2020-12-21
Supplement: CAS-112-715-s001.pdf [file CAS-112-715-s001.pdf]

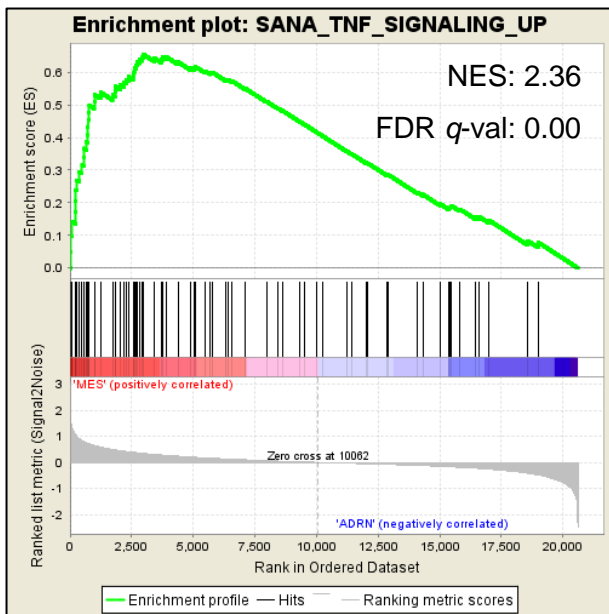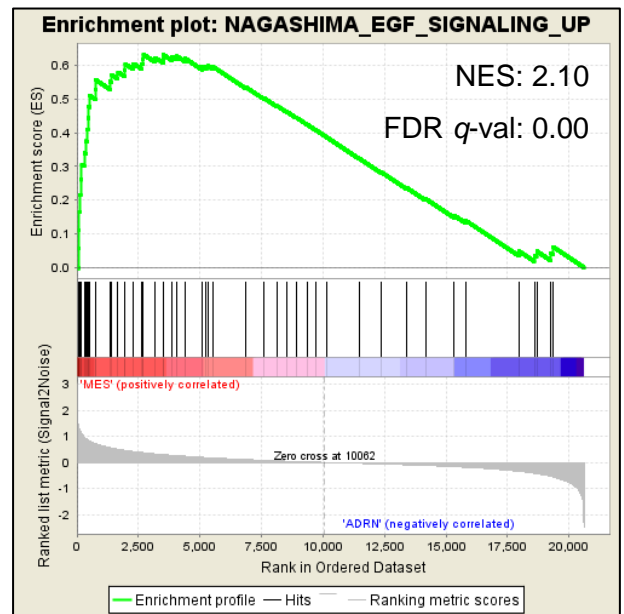

### Supplementary Figure S1: Examples of gene set enrichment analysis (GSEA) result

Positive label (red color) is MES-phenotype enriched genes and negative label (blue color) is ADRN-phenotype enriched genes. Normalized enrichment scores (NES) and False discovery rate q-values (FDR  $q$ -val) are shown. Both example gene sets, “SANA\_TNF\_SIGNALING\_UP” and “NAGASHIMA\_EGF\_SIGNALING\_UP”, are significantly enriched in MES-phenotype.

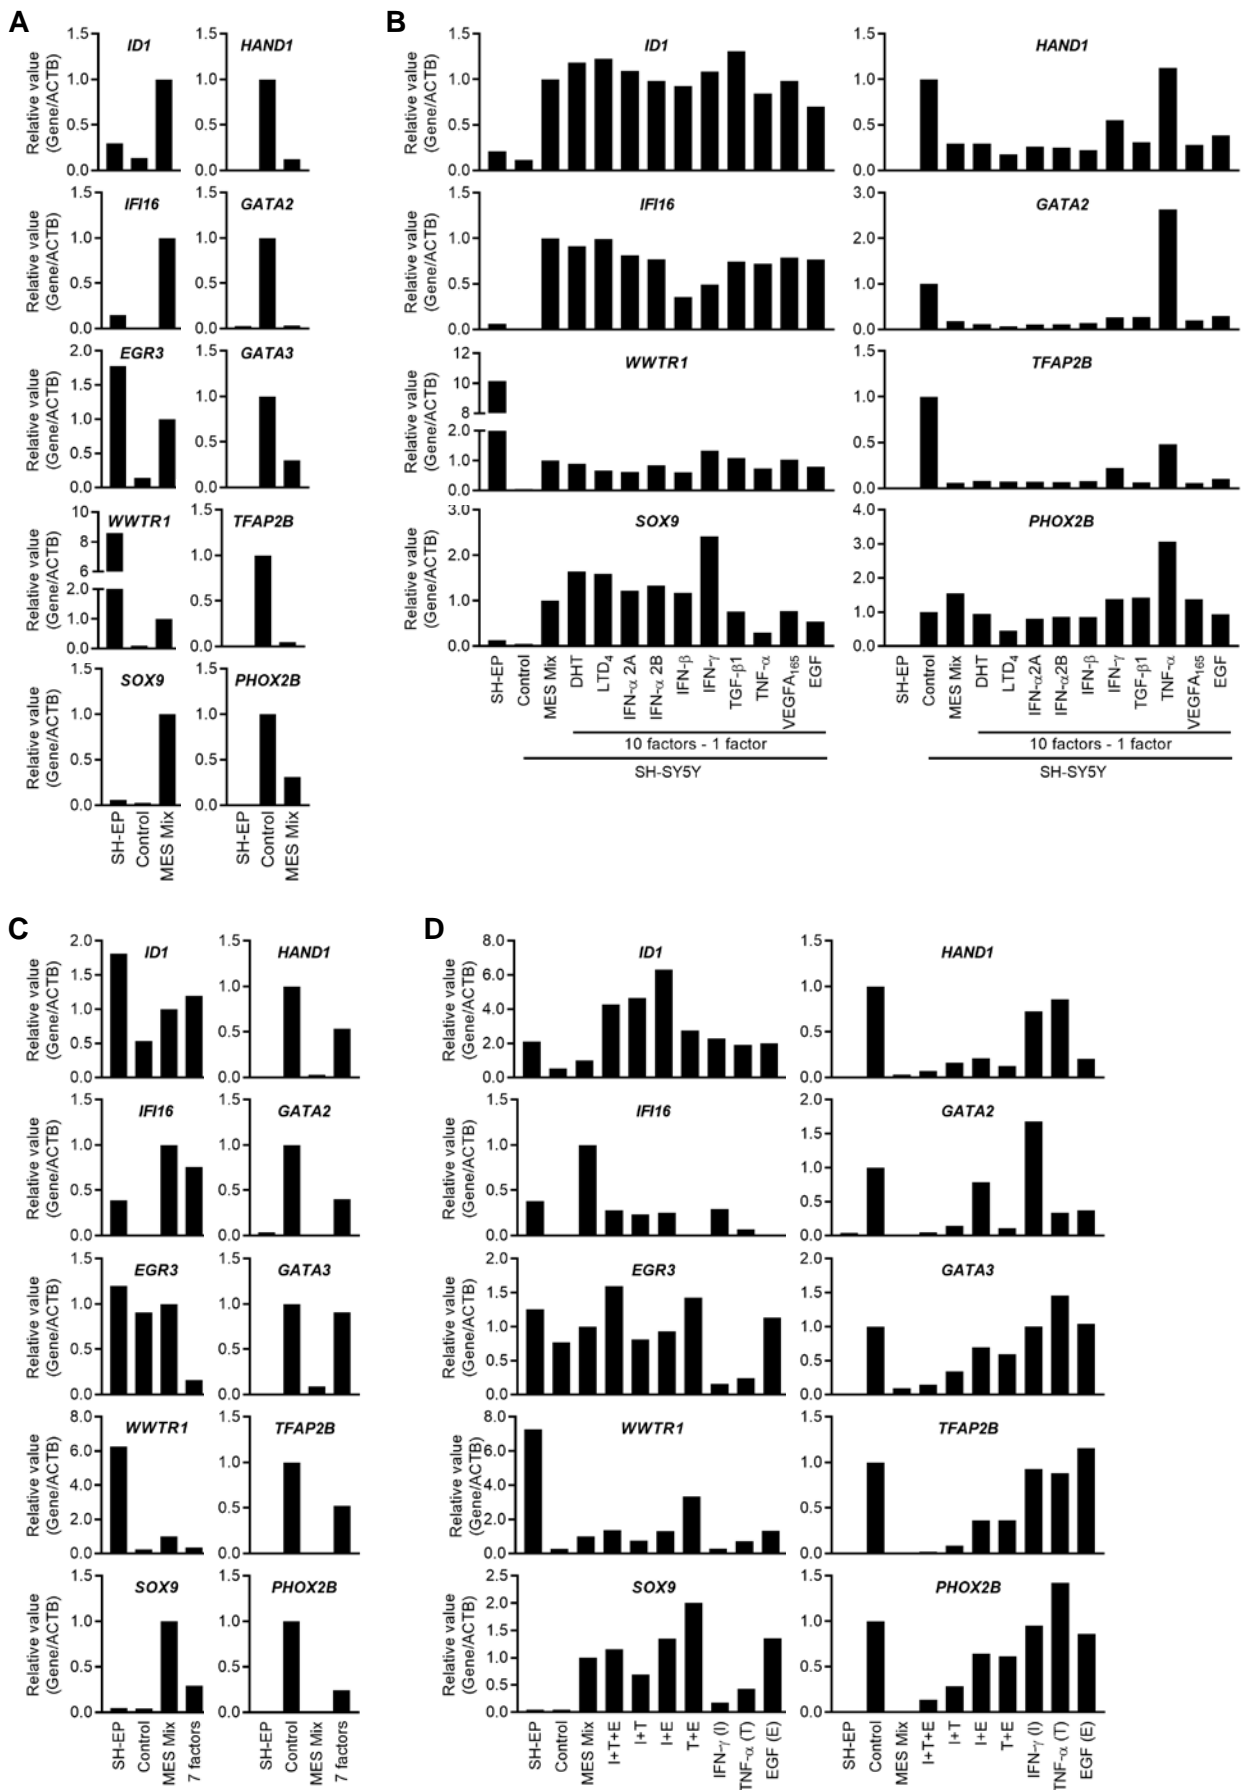

### Supplementary Figure S2: qPCR experiment (repeated)

Repeated qPCR experiment results. A, Repeat for Figure 1C. B, Repeat for Figure 2A. C, Repeat for Figure 2B. D, Repeat for Figure 2C.

## **NOTCH1 expression**

vs MES score:  $r = 0.698$

vs ADRN score:  $r = -0.563$

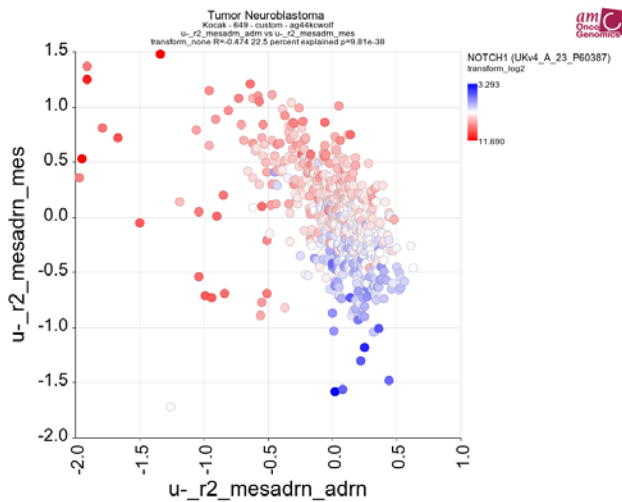

## **NOTCH2 expression**

vs MES score:  $r = 0.832$

vs ADRN score:  $r = -0.573$

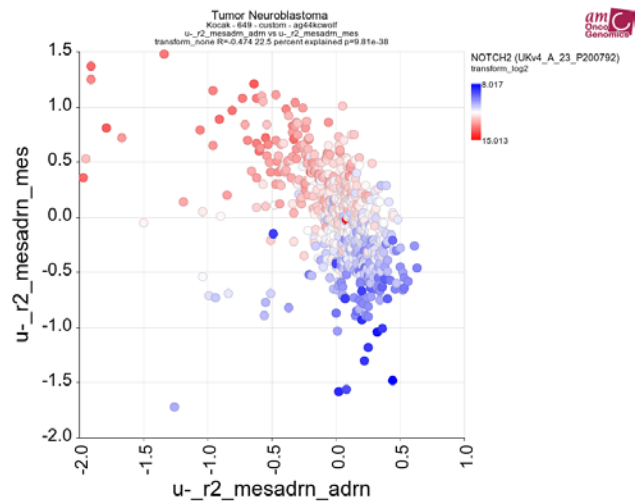

### **Supplementary Figure S3: Expressions of NOTCH1 and NOTCH2 and their association with MES or ADRN signature scores**

Expression of *NOTCH1* and *NOTCH2* in 649 human neuroblastoma cohort ("Kocak - 649 - custom - ag44kewolf" in R2 platform). X-axis shows the ADRN signature scores and Y-axis shows the MES signature scores. Color indicates log<sub>2</sub> transformed expression levels. Correlation coefficients between gene expressions and signature scores were shown.
